# Supplementary material for: Tunable thermopower and thermal conductivity in Lu doped In2O3
Source: Royal Society of Chemistry journal article supplement (doi:10.1039/c4ra02358g), 2014-01-01
Supplement: c4ra02358g1.pdf [file c4ra02358g1.pdf]

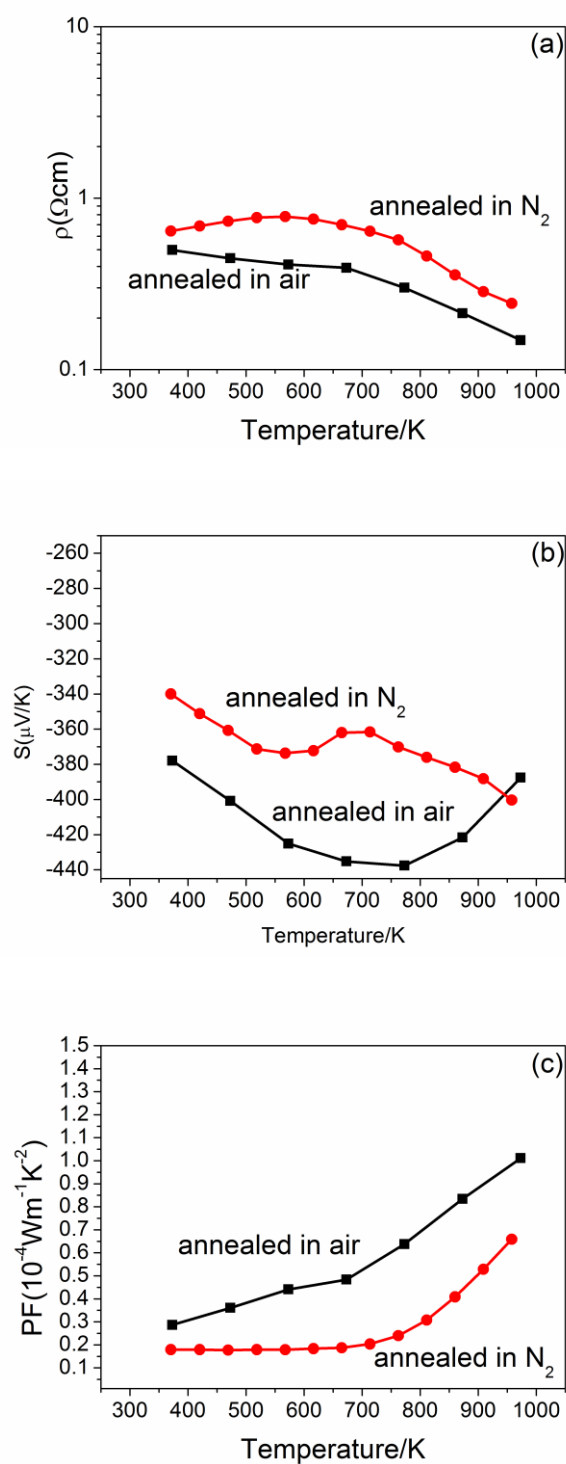

Fig.S1 Electrical properties measurements on  $\text{In}_{2-2x}\text{Lu}_{2x}\text{O}_3$  ( $x=0.05$ ) between 373K and 973K: Electrical resistivity(a) Thermopower(b) and Power factor(c). Samples were annealed in air and  $\text{N}_2$  respectively before measurements
